# Supplementary material
Source: PubMed Central journal article supplement (PMC2910436)
Supplement: NIHMS214703-supplement-01.pdf [file NIHMS214703-supplement-01.pdf]

## **Supplemental Data Inventory**

**Figure S1.** Additional Experiments Related to Figure 1

**Figure S2.** Additional Experiments Related to Figure 2

**Figure S3.** Requirement of BDH2 for Intracellular Iron Homeostasis in Mouse mIMCD Kidney Cells (Related to Figures 4, 5 and 6)

**Figure S4.** A Putative Yeast Homologue of Bacterial EntA has Functional Similarities to Mammalian BDH2 (Related to Figures 4 and 7)

**Figure S5.** Assessment of the Purity of Mitochondrial Preparations (Related to Figure 6)

**Figure S6.** Additional Experiments Related to Figure 7

**Figure S7.** Model for Siderophore- and 24p3-Mediated Iron Trafficking (Related to the Discussion section)

**Table S1.** Sequences for shRNAs, RT-PCR Primers and Morpholino Oligonucleotides (Related to Experimental Procedures and Supplemental Experimental Procedures)

**Table S1. Sequences for shRNAs, RT-PCR Primers and Morpholino Oligonucleotides**

| <b>shRNAs</b>                         | <b>Sequence (5' → 3')</b>   | <b>Notes</b>                                             |
|---------------------------------------|-----------------------------|----------------------------------------------------------|
| Bdh2-1                                | ACGAGAGTGTGACTCTTTAATA      |                                                          |
| Bdh2-2                                | ACTGAAAACCTTCCTAACAGA       |                                                          |
|                                       |                             |                                                          |
| <b>RT-PCR primers</b>                 |                             |                                                          |
| murine <i>Bdh2</i>                    | GAGAACAGATGTGTGTACAGTGCTACC | Forward                                                  |
|                                       | CTAGGAAGGGCCTGTCTTCCCAGC    | Reverse                                                  |
| <i>Gapdh</i>                          | ACCACAGTCCATGCCATCAC        | Forward                                                  |
|                                       | TCCACCACCCTGTTGCTGTA        | Reverse                                                  |
| $\alpha$ -globin                      | CTCTCTGGGGAAGACAAAAGCAAC    | Forward                                                  |
|                                       | GGTGGCTAGCCAAGGTCACCAGCA    | Reverse                                                  |
| $\beta$ -globin                       | CACAACCCAGAACAGACA          | Forward                                                  |
|                                       | CTGACAGATGCTCTCTTGGG        | Reverse                                                  |
| zebrafish <i>bdh2</i>                 | CGTGTGTTGTTTTCACTAGTTGTC    | Forward                                                  |
|                                       | CCGTAGCAGTGACTTGAGCA        | Reverse                                                  |
| <i>hbae1</i>                          | GGACACGATGCTCTCTCCAG        | Forward                                                  |
|                                       | GAGGATGTTGTGGGACAGAA        | Reverse                                                  |
| <i>hbae3</i>                          | AGATCGGCCGTGAGACTCTT        | Forward                                                  |
|                                       | TTAGCGGTACTTCTCGGACAG       | Reverse                                                  |
|                                       |                             |                                                          |
| <b>Primers for cloning riboprobes</b> |                             |                                                          |
| <i>hbae1</i>                          | GGACACGATGCTCTCTCCAG        | Forward                                                  |
|                                       | GAGGATGTTGTGGGACAGAA        | Reverse                                                  |
| <i>hbae3</i>                          | AGATCGGCCGTGAGACTCTT        | Forward                                                  |
|                                       | TTAGCGGTACTTCTCGGACAG       | Reverse                                                  |
| <i>bdh2</i>                           | TATTGAAGACTATGGGTCGTCTGGA   | Forward                                                  |
|                                       | TGTTTGCCATTAATAAAGAAAA      | Reverse                                                  |
|                                       |                             |                                                          |
| <b>Morpholino oligos</b>              | <b>Sequence (5' → 3')</b>   |                                                          |
| <i>bdh2</i>                           | GAAGAACTTACTGACAAGTGACAAC   | Designed against the first intron to induce a mis-splice |
|                                       | ACTTCCCCTCCAGACGACCCATAG    | Designed against the start codon to block translation    |
| <i>control</i>                        | CCTCTTACCTCAGTTACAATTTATA   |                                                          |
